# Supplementary material for: A new universal force-field for the Li2S–P2S5system
Source: Royal Society of Chemistry journal article supplement (doi:10.1039/d1cp05393k), 2022-01-01
Supplement: d1cp05393k2.pdf [file d1cp05393k2.pdf]

# Supplementary Information: A new universal force-field for the $\text{Li}_2\text{S}-\text{P}_2\text{S}_5$ system

Shunsuke Ariga <sup>a</sup>    Takahiro Ohkubo <sup>\*a</sup>    Shingo Urata <sup>b</sup>    Yutaka Imamura <sup>b</sup>  
Taketoshi Taniguchi <sup>b</sup>

*<sup>a</sup>Graduate School of Science and Engineering,*

Chiba University, 1-33 Yayoi-cho Inage-ku, Chiba 263-8522, Japan

*<sup>b</sup>Innovative Technology Laboratories,*

AGC Inc., Yokohama 230-0045, Kanagawa, Japan

## 1 LAMMPS inputs

LAMMPS (3 Mar 2020) input files used for the validation are listed:

- $\gamma$ - $\text{Li}_3\text{PS}_4$ : gamma-Li3PS4.in gamma-Li3PS4.data
- $\beta$ - $\text{Li}_3\text{PS}_4$ : beta-Li3PS4.in beta-Li3PS4.data
- $\text{Li}_4\text{P}_2\text{S}_6$ : Li4P2S6.in Li4P2S6.data
- $\text{Li}_7\text{P}_3\text{S}_{11}$ : Li7P3S11.in Li7P3S11.data
- $\text{Li}_7\text{PS}_6$ : Li7PS6.in Li7PS6.data
- 67 $\text{Li}_2\text{S}$ -33 $\text{P}_2\text{S}_5$  glass: 67Li2S-33P2S5.in 67Li2S-33P2S5.data
- 70 $\text{Li}_2\text{S}$ -30 $\text{P}_2\text{S}_5$  glass: 70Li2S-30P2S5.in 70Li2S-30P2S5.data
- 75 $\text{Li}_2\text{S}$ -25 $\text{P}_2\text{S}_5$  glass: 75Li2S-25P2S5.in 75Li2S-25P2S5.data
- Three-body potential: Li-S.sw

## 2 Force-field parameters

Table S1: Lennard-Jones pair parameters of atoms  $i$  and  $j$  in Class II potential. Parameters for a combination of different two types of P2, Pa, P4, S2, S1, Sc, or S4 are derived from Waldman–Hagler combining rules.

| $i$ | $j$ | $\epsilon/\text{kJ/mol}$ | $r^0/\text{\AA}$ | $i$ | $j$ | $\epsilon (\text{kJ/mol})$ | $r^0/\text{\AA}$ |
|-----|-----|--------------------------|------------------|-----|-----|----------------------------|------------------|
| Li  | Li  | 0                        | 0                | Pa  | S4  | 0.0185256                  | 4.70106          |
| Li  | P2  | 0                        | 0                | P4  | P4  | 286.462                    | 1.42927          |
| Li  | Pa  | 0                        | 0                | P4  | S2  | 1.91098                    | 3.62871          |
| Li  | P4  | 0                        | 0                | P4  | S1  | 0.666463                   | 4.10262          |
| Li  | S2  | 3.18402                  | 2.87451          | P4  | Sc  | 4.79110                    | 3.14097          |
| Li  | S1  | 6.87732                  | 2.68218          | P4  | S4  | 0.242553                   | 4.70137          |
| Li  | Sc  | 5.70836                  | 2.65312          | S2  | S2  | 1.71023                    | 4.07182          |
| Li  | S4  | 4.56893                  | 2.73400          | S2  | S1  | 0.806141                   | 4.37816          |
| P2  | P2  | 102.307                  | 0.935300         | S2  | Sc  | 2.54094                    | 3.84569          |
| P2  | Pa  | 85.2078                  | 0.845927         | S2  | S4  | 0.357938                   | 4.85356          |
| P2  | P4  | 88.9600                  | 1.28948          | S1  | S1  | 0.434036                   | 4.60435          |
| P2  | S2  | 0.320577                 | 3.62767          | S1  | Sc  | 1.04667                    | 4.22896          |
| P2  | S1  | 0.111702                 | 4.10206          | S1  | S4  | 0.219075                   | 4.99641          |
| P2  | Sc  | 0.805645                 | 3.13883          | Sc  | Sc  | 4.53320                    | 3.52301          |
| P2  | S4  | 0.0406344                | 4.70108          | Sc  | S4  | 0.419943                   | 4.76802          |
| Pa  | Pa  | 224.376                  | 0.631531         | S4  | S4  | 0.130121                   | 5.27676          |
| Pa  | P4  | 43.4183                  | 1.27491          | Li  | S0  | 4.86227                    | 2.83510          |
| Pa  | S2  | 0.146170                 | 3.62759          | P4  | S0  | 2.76741                    | 4.01127          |
| Pa  | S1  | 0.0509280                | 4.10201          | S4  | S0  | 0.826743                   | 4.96363          |
| Pa  | Sc  | 0.367408                 | 3.13866          | S0  | S0  | 6.53884                    | 4.50173          |

Table S2: Bond parameters of bonded atoms  $i$ - $j$  in Class II potential.

| $i$ | $j$ | $r_0/\text{\AA}$ | $K_2/\text{kJ/mol}/\text{\AA}$ | $K_3/\text{kJ/mol}/\text{\AA}^3$ | $K_4/\text{kJ/mol}/\text{\AA}^4$ |
|-----|-----|------------------|--------------------------------|----------------------------------|----------------------------------|
| P2  | S2  | 2.05800          | 759.383                        | 243.108                          | 168.519                          |
| Pa  | S1  | 2.06993          | 673.925                        | 90.4907                          | 2326.70                          |
| Pa  | Sc  | 2.28618          | 327.446                        | 78.7211                          | 1192.39                          |
| P4  | S4  | 2.09744          | 508.620                        | 26.5935                          | 2697.60                          |
| P2  | P2  | 2.31455          | 659.411                        | 627.968                          | 601.387                          |

Table S3: Angle parameters of bonded atoms  $i$ - $j$ - $k$  with  $j$  center in Class II potential.

| $i$ | $j$ | $k$ | $\theta_0/^\circ$ | $K_2/\text{kJ/mol}/\text{rad}^2$ | $K_3/\text{kJ/mol}/\text{rad}^3$ | $K_4/\text{kJ/mol}/\text{rad}^4$ |
|-----|-----|-----|-------------------|----------------------------------|----------------------------------|----------------------------------|
| P2  | P2  | S2  | 104.305           | 135.767                          | 203.550                          | 769.375                          |
| Pa  | Sc  | Pa  | 116.460           | 355.808                          | 45.8048                          | 1984.85                          |
| S2  | P2  | S2  | 115.313           | 177.728                          | 267.296                          | 1806.27                          |
| S1  | Pa  | S1  | 114.173           | 216.016                          | 48.6377                          | 191.055                          |
| S1  | Pa  | Sc  | 105.522           | 149.132                          | 38.1655                          | 416.925                          |
| S4  | P4  | S4  | 109.460           | 201.806                          | 75.1756                          | 803.675                          |

Table S4: Bond-bond (bb) and bond-angle (ba) parameters of bonded atoms  $i$ - $j$ - $k$  with  $j$  center in Class II potential.

| $i$ | $j$ | $k$ | $M/\text{kJ/mol}/\text{\AA}$ | $N_1/\text{kJ/mol}/\text{\AA}$ | $N_2/\text{kJ/mol}/\text{\AA}^2$ | $r_1/\text{\AA}$ | $r_2/\text{\AA}$ |
|-----|-----|-----|------------------------------|--------------------------------|----------------------------------|------------------|------------------|
| P2  | P2  | S2  | 21.5633                      | 19.6593                        | 111.905                          | 2.26144          | 2.05203          |
| Pa  | Sc  | Pa  | 397.935                      | 211.374                        | 249.228                          | 2.09524          | 2.12546          |
| S2  | P2  | S2  | 43.6646                      | 183.480                        | 224.394                          | 1.96742          | 2.07272          |
| S1  | Pa  | S1  | 89.8430                      | 89.2376                        | 84.0482                          | 2.06174          | 2.02696          |
| S1  | Pa  | Sc  | 47.7348                      | 74.6585                        | 103.964                          | 2.07712          | 2.13569          |
| S4  | P4  | S4  | 127.641                      | 70.7761                        | 96.2362                          | 2.17645          | 2.18138          |

Table S5: Dihedral parameters of bonded atoms  $i$ - $j$ - $k$ - $l$  in Class II potential.

| $i$ | $j$ | $k$ | $l$ | $K_1/\text{kJ/mol}$ | $\phi_1/^\circ$ | $K_2/\text{kJ/mol}$ | $\phi_2/^\circ$ | $K_3/\text{kJ/mol}$ | $\phi_3/^\circ$ |
|-----|-----|-----|-----|---------------------|-----------------|---------------------|-----------------|---------------------|-----------------|
| Pa  | Sc  | Pa  | S1  | 2.67041             | 195.783         | 3.16898             | 103.391         | 1.91883             | 133.865         |
| S2  | P2  | P2  | S2  | 0.0                 | 0.0             | 0.0                 | 0.0             | 0.0                 | 0.0             |

Table S6:  $\lambda$  and  $\cos\theta^0$  parameters with  $i$  center of nonbonded atoms  $i$ - $j$ - $k$  in Stillinger–Weber potential.

| $i$ | $j$ | $k$ | $\lambda/\text{kJ/mol}$ | $\cos\theta^0$ |
|-----|-----|-----|-------------------------|----------------|
| Li  | S2  | S2  | 72.3481                 | -0.106294      |
| Li  | S2  | S1  | 272.660                 | -0.276177      |
| Li  | S2  | Sc  | 2151.02                 | -0.376578      |
| Li  | S2  | S4  | 534.782                 | -0.317077      |
| Li  | S1  | S1  | 797.550                 | -0.0672886     |
| Li  | S1  | Sc  | 71.4410                 | -0.0212434     |
| Li  | S1  | S4  | 217.683                 | -0.409570      |
| Li  | Sc  | Sc  | 1438.18                 | 0.124328       |
| Li  | Sc  | S4  | 443.881                 | 0.0118708      |
| Li  | S4  | S4  | 50.7193                 | -0.250519      |
| Li  | S4  | S0  | 33.3340                 | 0.0535239      |
| Li  | S0  | S0  | 2248.17                 | -0.348738      |

Table S7:  $\gamma$  parameters in Stillinger–Weber potential.  $r^{\text{cut}} = 5.0 \text{ \AA}$  for all pairs.

| $i$ | $j$ | $\gamma$ /unitless |
|-----|-----|--------------------|
| Li  | S2  | 4.61683            |
| Li  | S1  | 5.47149            |
| Li  | Sc  | 5.11593            |
| Li  | S4  | 5.42257            |
| Li  | S0  | 5.26419            |

### 3 Mean square displacements

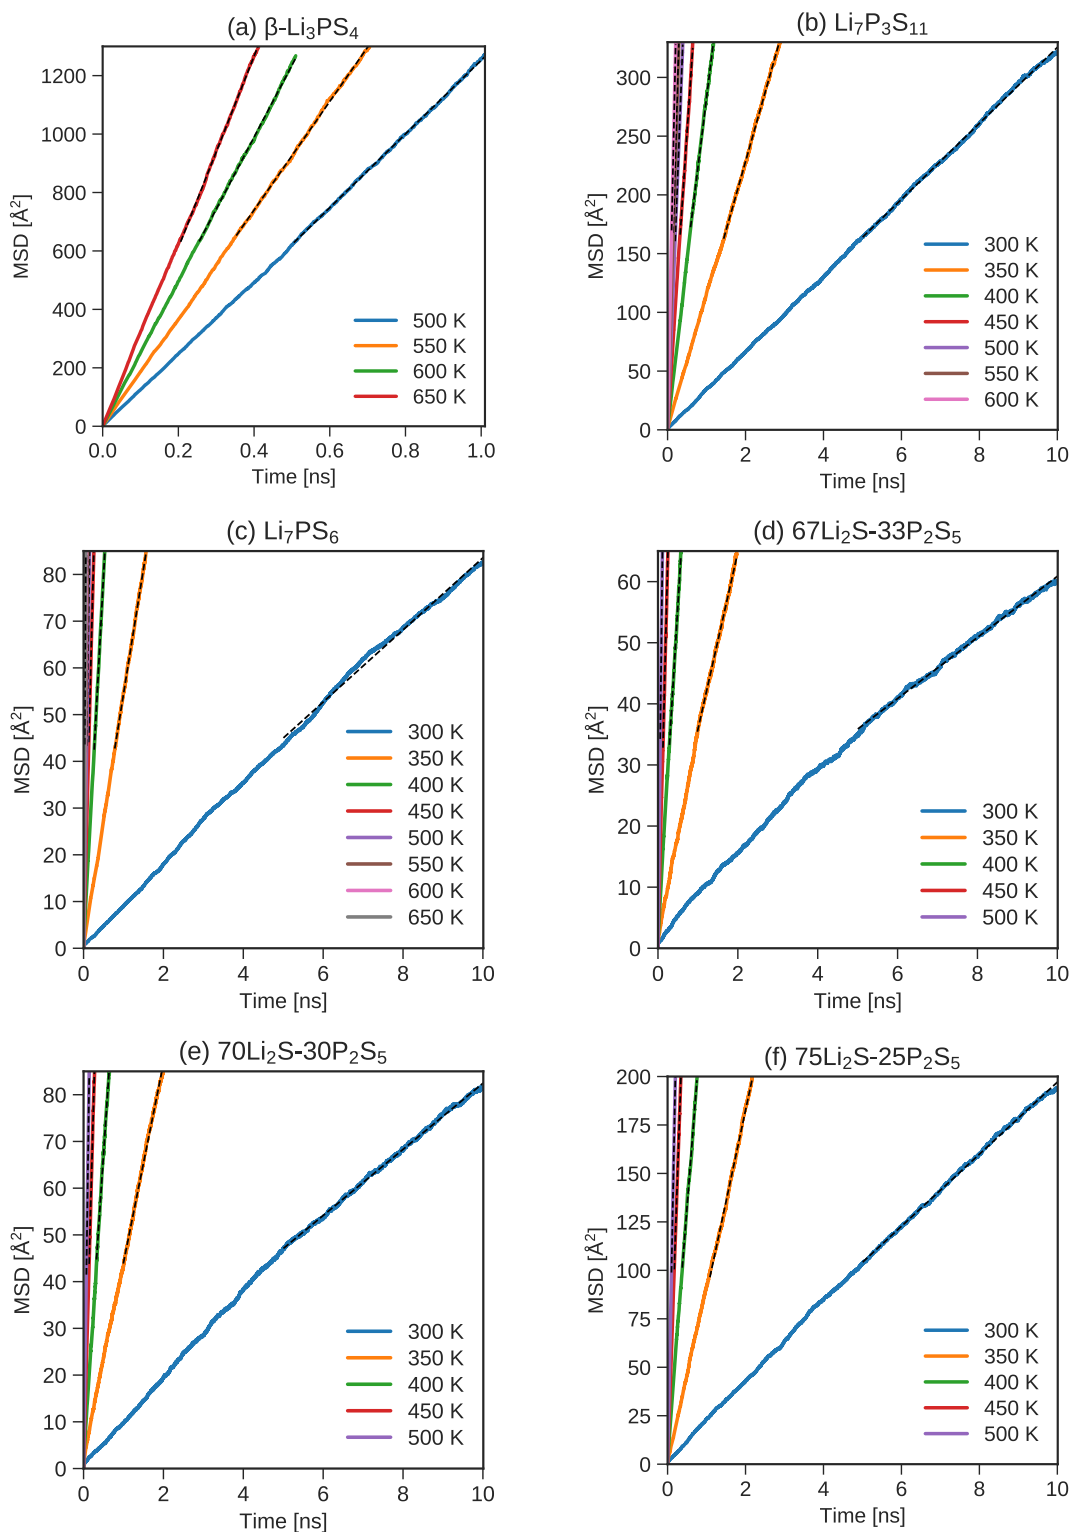

Figure S1: Mean square displacement (MSD) of Li in six compounds with various temperatures are displayed in (a)–(f). Diffusion coefficients are calculated from linear regression drawn with black dashed lines. The fitting time range were half of all simulation run at each temperature.

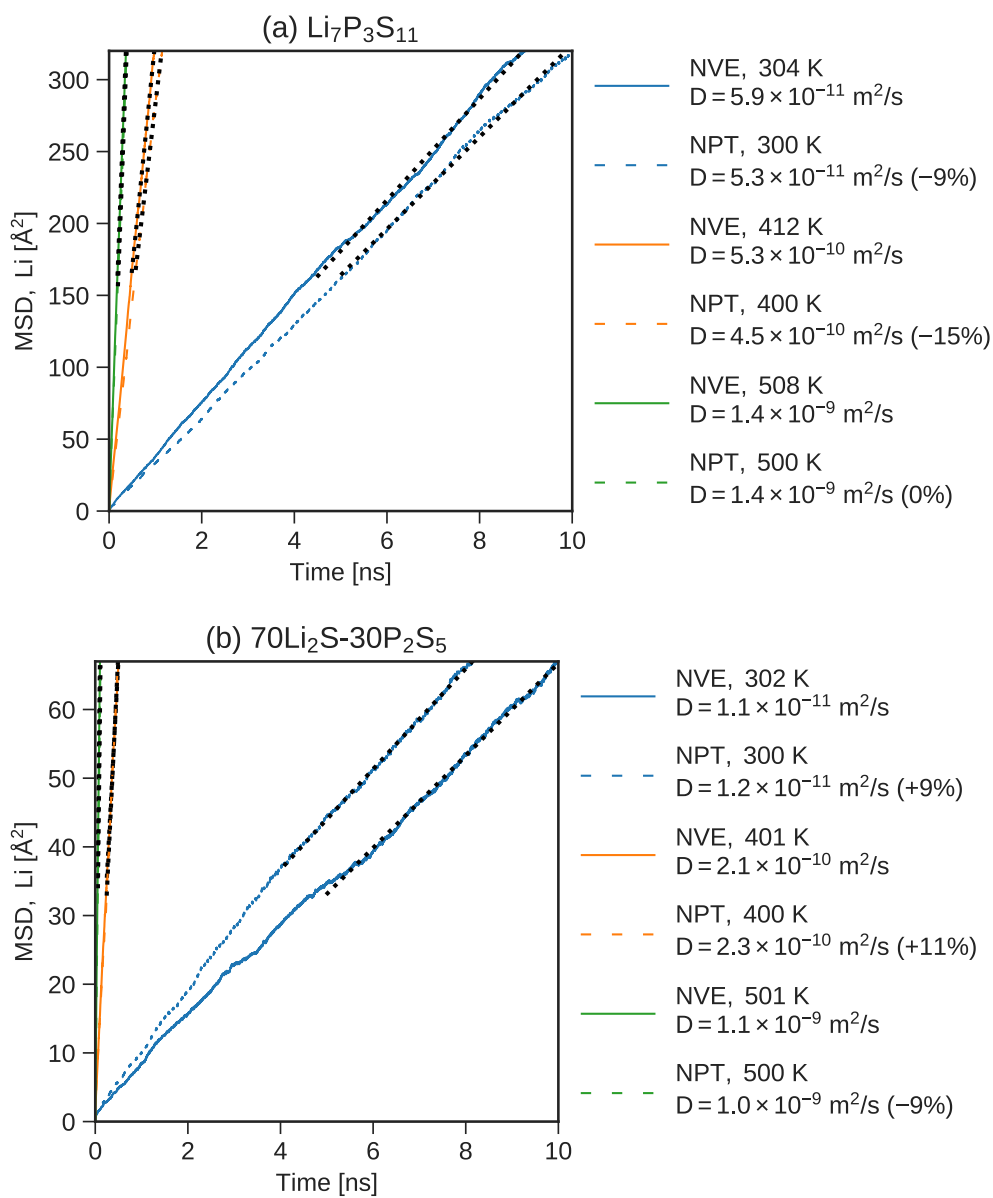

Figure S2: Mean square displacement (MSD) of Li under micro-canonical (NVE) and isobaric-isothermal (NPT) ensembles with various temperatures for (a)  $\text{Li}_7\text{P}_3\text{S}_{11}$  crystal and (b)  $70\text{Li}_2\text{S}-30\text{P}_2\text{S}_5$  glass. The temperatures are average values during the simulation run. Diffusion coefficients are calculated from linear regression drawn with black dashed lines. The discrepancy of  $D$  between NPT and NVE was shown in parenthesis in %.
